1  
2  
3  
4  
5  
6  
7  
8  
9  
10  
11  
12  
13  
14  
15  
16  
17  
18  
19  
20  
21  
22  
23  
24  
25  
26  
27  
28  
29  
30  
31  
32  
33  
34

## **Ribosome profiling uncovers selective mRNA translation associated with eIF2 phosphorylation in erythroid progenitors**

Nahuel A. Paolini<sup>1¶</sup>, Kat S. Moore<sup>1¶</sup>, Franca M. di Summa<sup>1</sup>, Ivo F.A.C. Fokkema<sup>2</sup>, Peter A.C. 't Hoen<sup>2</sup>,  
Marieke von Lindern<sup>1\*</sup>

- 1) Department of Hematopoiesis, Sanquin Research, and Landsteiner Laboratory AMC/UvA, 1066 CX Amsterdam, The Netherlands
- 2) Department of Human Genetics, Leiden University Medical Center, 2300 RC Leiden, The Netherlands

\* To whom correspondence should be addressed. Tel: +31 20 512 3377; Fax: +31 20 512 3474; Email: m.vonlindern@sanquin.nl

¶These authors contributed equally to this work.

## 35 Abstract

36 The regulation of translation initiation factor 2 (eIF2) is important for erythroid survival and differentiation.  
37 Lack of iron, a critical component of heme and hemoglobin, activates Heme Regulated Inhibitor (HRI). This  
38 results in phosphorylation of eIF2 and reduced eIF2 availability, which inhibits protein synthesis. Translation of  
39 specific transcripts such as *Atf4*, however, is enhanced. Upstream open reading frames (uORFs) are key to this  
40 regulation. The aim of this study is to investigate how eIF2 phosphorylation affects mRNA translation in  
41 erythroblasts. Ribosome profiling combined with RNA sequencing was used to determine translation initiation  
42 sites and ribosome density on individual transcripts. Treatment of erythroblasts with Tunicamycin (Tm)  
43 increased phosphorylation of eIF2 2-fold. At a false discovery rate of 1%, ribosome density was increased for  
44 147 transcripts, among which transcriptional regulators such as *Atf4*, *Tis7/lfrd1*, *Pnrc2*, *Gtf2h*, *Mbd3*, *JunB* and  
45 *Kmt2e*. Translation of 337 transcripts decreased more than average, among which *Dym* and *Csde1*. Ribosome  
46 profiling following Harringtonine treatment uncovered novel translation initiation sites and uORFs. Surprisingly,  
47 translated uORFs did not predict eIF2-dependent translation efficiency, but uORF identity differs. The  
48 regulation of transcription and translation factors in response to eIF2 phosphorylation may explain the large  
49 overall response to iron deficiency in erythroblasts.

50

51 - eif2 dependent translation in erythroblasts during proteotoxic stress determined by ribosome footprinting

52 - identification of transcription factors upregulated in response to eIF2 phosphorylation

53 - Advantages and disadvantages of translation initiation site determination using harringtonine

54 - distinct uORF pattern in transcripts with enhanced, or more than average reduced translation upon  
55 proteotoxic stress

56

57

58

## 59 Introduction

60 Iron is an important element for life, but its strong reducing capacity is also very toxic and could create  
61 oxidative radicals in the cell [1]. Therefore, the uptake of iron from the diet is limited, and circulating iron is  
62 always bound to carriers. Iron is a rate limiting factor for the production of hemoglobin during red blood cell  
63 development [2]. Iron deficiency reduces heme availability, and risks the accumulation and aggregation of free  
64  $\alpha$ - and  $\beta$ -globin proteins that damage the cell [3]. Therefore, it is important that globin protein synthesis is  
65 adjusted to iron availability. The Iron response element binding proteins Irf1 and Irf2 control mRNA stability  
66 and translation of transcripts encoding proteins involved in iron homeostasis such as the Transferrin receptor,  
67 Ferroportin, and Ferritin [4]. Animal models for iron deficiency anemia, or iron depletion upon blood donation,  
68 indicate that not only differentiation, but also expansion of immature erythroblasts is impaired [5,6]. The  
69 cellular mechanism responsible for impaired erythroid recovery upon iron deficiency, however, is poorly  
70 understood.

71 Reduced availability of heme also activates eIF2 associated kinase 1 (eIF2ak1, also known as HRI  
72 [Heme Regulated Inhibitor]) that phosphorylates translation initiator factor 2 $\alpha$  (eIF2 $\alpha$ ) [7]. GTP-bound eIF2 and  
73 methionine-loaded initiator tRNA (tRNA<sub>i</sub><sup>met</sup>) form the ternary complex (TC). The TC binds to the 40S small  
74 ribosomal subunit in the preinitiation scanning complex. The GTPase activity of eIF2 is activated when the  
75 scanning complex pauses at a translation start site, which results in release of methionine to the P-site of the  
76 ribosome, and dissociation of both tRNA<sub>i</sub> and GDP-bound eIF2 from the scanning complex [8]. The GDP-GTP  
77 exchange factor eIF2B reloads eIF2 with GTP, which enables eIF2 to bind tRNA<sub>i</sub><sup>met</sup> and to re-associate with a  
78 preinitiation scanning complex. Phosphorylation of the  $\alpha$ -chain of eIF2 (eIF2 $\alpha$ ) on Ser51 by HRI prevents  
79 exchange of GDP for GTP and thereby recovery of the TC. As a result protein synthesis is inhibited to decrease  
80 globin production, which prevents damage from globin protein aggregates [9]. Three additional kinases are  
81 able to phosphorylate eIF2 $\alpha$ : the double-stranded RNA-dependent kinase (PKR, or Eif2ak2), the ER-stress  
82 activated kinase PERK (Eif2ak3), and GCN2 (general control nonderepressible 2, or Eif2ak4) that is activated by  
83 uncharged tRNA upon lack of amino acids [10].

84 Translational control by eIF2 is, at least in part, mediated through translation of upstream open  
85 reading frames (uORFs). Whereas general translation is repressed, translation of specific transcripts is  
86 increased upon eIF2 phosphorylation, as described for *Atf4*. A distance of ~90 nt between the first and second

87 uORF allows for re-association in absence of eIF2 phosphorylation [11]. Translation of the second uORF  
88 overlapping the start codon of the protein coding ORF inhibits Atf4 protein expression. Reduced availability of  
89 eIF2 decreases translation initiation at the second uORF (also referred to as leaky scanning), and increases  
90 translation of the *Atf4* protein coding ORF. The short distance between uORFs is crucial for eIF2-mediated  
91 control of translation [11,12]. Phosphorylation of eIF2 also reduces the recognition of start codons in a  
92 suboptimal Kozak consensus context as is exemplified by the regulation of *Ddit3* (Death and differentiation  
93 induced transcript 3, also known as Chop). The inhibitory uORF of *Ddit3* is poorly translated upon eIF2  
94 phosphorylation, which increases Ddit3 protein expression [13]. Depending on the configuration of the 5'UTR,  
95 translation of specific transcripts can also be hypersensitive for eIF2 and cause a more than average repression  
96 of translation, as has been described for *Csde1* [14].

97       Whereas these examples demonstrate quantitative effects on protein synthesis, uORFs are also  
98 involved in qualitative changes in protein expression. A short distance between an uORF and the start codon of  
99 the protein coding ORF may result in partial availability of the protein initiating start codon. The presence of a  
100 downstream, in frame, start codon can subsequently result in expression of an N-terminally truncated short  
101 isoform. This leaky scanning controls for instance the balance between the long and short isoform of Tal1/Scl,  
102 an important transcription factor in erythropoiesis [15].

103       Heme-regulated phosphorylation of eIF2 and the subsequent regulation of mRNA translation, is  
104 important in the control of erythropoiesis. HRI-induced expression of Atf4 and its downstream target  
105 Ppp1r15a/Gadd34 constitutes an integrated stress response (ISR) that protects erythroid progenitors from  
106 oxidative stress during differentiation, and increases survival of erythroid cells when mice are fed a low iron  
107 diet [16]. Atf4 null mice displayed severe fetal anemia [17]. Modulation of the stress response is regulated by  
108 the dephosphorylation of eIF2 by Ppp1r15a and Ppp1r15b [18,19]. Loss of Ppp1r15a results in enlarged spleens  
109 with increased numbers of immature erythroid cells and low hemoglobin content [20]. Loss of Ppp1r15b  
110 increases the number of deformed erythroblasts and reduces the number of mature erythrocytes. The  
111 erythrocyte numbers were rescued when loss of Ppp1r15b was combined with the S51A knock-in mutation of  
112 eIF2, that abrogates eIF2 phosphorylation [21]. These phenotypes indicate that eIF2 phosphorylation is  
113 important for control of both expansion and differentiation of erythroblasts.

114       The importance of translational control in erythropoiesis was demonstrated by polyribosome profiling,  
115 which allows for the identification of RNA populations in distinct fractions of a density gradient that separates

116 subpolysomal RNA from low and high density polyribosomes [22,23]. Ribosome footprinting or ribo-seq allows  
117 for deep sequencing of mRNA fragments protected by the ribosome (ribosome footprints, RFPs) [24,25]. The  
118 RFPs are aligned to the genome, which maps the position of ribosomes at the nucleotide level and adds  
119 considerable detail to the analysis of mRNA translation. The aim of this study is to identify transcripts that are  
120 hypersensitive to eIF2 phosphorylation, and that encode proteins controlling expansion and differentiation of  
121 erythroblasts. We hypothesize that translation of uORFs renders transcripts sensitive to eIF2 phosphorylation  
122 because it controls re-association of the TC with the preinitiation scanning complex, which is required for  
123 translation of a subsequent ORF. We aim to identify cellular mechanisms regulated by eIF2 phosphorylation  
124 that are involved in erythroid homeostasis. We employed ribosome footprint analysis in combination with  
125 mRNA sequencing to identify both translation initiation sites (TIS) and the relative translation efficiency of  
126 transcripts. At a false discovery rate (FDR) of 1% we identified 147 transcripts subject to increased translation,  
127 and 337 transcripts subject to reduced translation upon eIF2 phosphorylation. Interestingly, the presence of  
128 translated uORFs was widespread, but did not predict sensitivity of the mRNA translation to eIF2  
129 phosphorylation. Among the transcripts subject to eIF2-dependent translation were several transcription  
130 factors that may alter programming of erythropoiesis upon eIF2 phosphorylation.

131

## 132 **Materials and methods**

133

### 134 **Cell culture**

135

136 The erythroblast cell line 15.4 was derived from p53-deficient mouse fetal livers as previously described [26],  
137 and cultured in Stempro-34 SFM (Thermo Fisher), containing penicillin-streptavidin, L-glutamin, Erythropoietin  
138 (1U/ml), Stem Cell Factor (supernatant CHO cells) and 1 $\mu$ M Dexamethasone (Sigma) [27]. For ER stress  
139 induction, cells were treated with 2.5 $\mu$ g/ml Tunicamycin (Tm) (Sigma) for 1.5h or left untreated.

140 *SDS-PAGE*. Whole cell lysates were loaded on 10% polyacrylamide gels (Biorad). Western blots were performed  
141 as previously described [22]. Antibodies used were eIF2 (Cell Signaling) and pSer51-eIF2 (Cell Signaling).

142

## 143 Polysome profiling

144

145  $10^7$  cells were lysed in polysome lysis buffer (110 mM potassium acetate, 20 mM magnesiumacetate, 10 mM  
146 HEPES, 100 mM potassium chloride, 10 mM magnesium chloride, 0.1% NP-40, 2 mM DTT, 40 U/mL RNase  
147 inhibitor [Thermo Fisher], 100 µg/ml cycloheximide [CHX] [Sigma] and 1X mini Protease Inhibitor Cocktail  
148 [Roche]) and loaded onto 17-50% sucrose gradients [28]. The tubes were centrifuged at 40,000 rpm for 2 hours  
149 at 4°C in a SW41 rotor (Optima L100XP ultracentrifuge; Beckman Coulter). RNA was measured throughout the  
150 gradient with a BR-188 Density Gradient Fractionation System at OD<sub>254</sub> (Brandel). Area under the curve was  
151 calculated with Fiji, statistical significance was calculated with a t-test. P-values < 0.01 were considered  
152 significant.

153

## 154 Measurement of de novo protein synthesis

155

156 100,000 erythroblasts were seeded in methionine-free DMEM (Invitrogen) for 60 minutes to deplete  
157 intracellular methionine, followed by a 90 minutes exposure to Click-iT® AHA (a methionine analogue) in  
158 absence or presence of 2.5µg/ml Tm treatment. Newly synthesised protein was measured using the Click-iT®  
159 AHA Alexa Fluor® 488 Protein Synthesis HCS Assay (Thermo Scientific) according to manufacturer's instructions  
160 with some modifications. Briefly, using 2% paraformaldehyde for fixation and 1:1000 dilution of AHA.  
161 Fluorescence was measured by using an LSR-II flow cytometer and analyzed with FACSDiva software (BD  
162 Biosciences).

163

164

## 165 Ribosome profiling and RNAseq

166

167 The ribosome profiling strategy was adapted from Ingolia et al. [30] and based on De Klerk et al. [31], with  
168 some modifications. After Tm treatment, the cells were treated with 100 µg/ml cycloheximide (CHX) for 5 min  
169 at 37 °C or 2 µg/ml Harringtonine for 7 min followed by 2 min 100 µg/ml CHX at 37 °C. Cells were lysed in

170 polysome lysis buffer. Lysates were treated with 1500 units of RNase-I (Ambion) to digest the polysomes into  
171 monosomes. The 80S monosome fraction was isolated by ultracentrifugation (Beckman) on sucrose gradients  
172 and RNA was isolated as described [31]. Ribosomal RNA (rRNA) was removed with Ribozero Gold rRNA Removal  
173 Kit (Illumina). In this study, the Nebnext small RNA Library Prep Set for Illumina (NEB) was used, according to  
174 manufacturer's instructions and sequenced on a HiSeq Illumina. For RNAseq, mRNAs with a Poly-A tail were  
175 isolated, fragmented and sequenced on a HiSeq Illumina using the Truseq protocol.

176

## 177 **Data analysis**

178

179 Adapters were trimmed with cutadapt [32]. Reads were mapped to the transcriptome and unaligned reads to  
180 the genome with Spliced Transcripts Alignment to Reference (STAR) version 2.5.2b [33] with the following  
181 settings: --outFilterMultimapNmax 20 --outFilterMismatchNmax 1 --outSAMmultNmax 1. A GTF annotation file  
182 accessed from the UCSC genome browser on 11-Sept-2015 was passed to STAR to improve mapping accuracy.  
183 Translation efficiency was determined using the Bioconductor package edgeR (Empirical Analysis of Gene  
184 Expression Data in R) [34,35]. edgeR utilizes a negative binomial distributed model for each gene and sample,  
185 scaled by library size and relative abundance per experimental group. An empirical Bayes procedure is applied  
186 to shrink dispersions towards a consensus value. Ribosome density was estimated via the application of a  
187 generalized linear model to determine the interaction between sequence assay (ribosome profiling versus RNA-  
188 seq) and condition (Tm-treated versus untreated) while also taking variation between different independent  
189 replicate experiments (performed on three different days) into account, using the formula  $\text{expression level} \sim$   
190  $\text{replicate} + \text{condition} * \text{type} + \text{error}$ . The application of an interaction term is a statistically formalized way of  
191 detecting which transcripts are translated with different efficiencies upon Tm treatment, as their level of active  
192 translation (ribosome profiling) will respond differently to Tm treatment than their total RNA levels (RNA-seq).

193 Prior to statistical analysis, ribosome footprint reads were separated based on their position in the  
194 5'UTR, the protein coding ORF of the reference transcript 1 (CDS), or the 3'UTR. We did not correct for mapping  
195 a read to the first nucleotide of the protected fragment, which was position -13 compared to the protected A-  
196 site. As a consequence, the first 4 protected codons of the CDS are mapped to the 5'UTR. In addition, genes  
197 with less than 10 cumulative reads for half of the available samples were removed. The gene list was further

198 filtered on genes containing at least an average 10 RNA-seq reads and an average of 4 ribo-seq reads for all  
199 three replicates. This additional filtering step was applied to account for the poly(A) selection, through which  
200 transcripts (such as histones) lacking a poly(A) tail are incorrectly identified as significant. Transcripts with a  
201 false discovery rate (FDR) < 1% were considered significantly changed. Reported read counts were normalized  
202 by counts per million (CPM).

203 Identification of translation initiation sites (TIS) in Ht treated samples was performed by a previously  
204 published bioinformatics peak calling analysis [31]. ORF coordinates were assigned with Mutalyzer [36]. In this  
205 analysis, peaks were defined as having >40% of all coverage in the first position and a minimum total coverage  
206 of 20. Candidate peaks were considered only if they were a maximum distance of 500nt up- or downstream of  
207 an annotated coding sequence (CDS). The maximum coverage for the subsequent 5 downstream codons  
208 cannot be higher than the candidate peak, and the candidate peak must have at least 10% of coverage relative  
209 to the highest candidate to be considered. Statistical analysis of TIS switching was performed using the R  
210 package lme4 (Linear Mixed-Effect Models using 'Eigen' and S4) [37]. The model was fitted as previously  
211 described [31]. Briefly, fixed effects were assigned for location of the TIS location, Tm treatment, and the  
212 interaction between the two. Counts were weighted by library size. Significance between models with and  
213 without Tm treatment was determined via a chi-squared likelihood-ratio test and corrected via Benjamini-  
214 Hochberg (FDR) at a threshold of 5%.

215 For UCSC browser snapshots we visualised the peak at the first nucleotide of the RFP and the sum of  
216 all three replicates. For metagene analysis we used the RiboGalaxy webtool [38].

217

## 218 **Results**

219

### 220 **Induction of eIF2 phosphorylation in erythroblasts decreases protein** 221 **synthesis**

222

223 To evaluate the effect of eIF2 phosphorylation on mRNA translation in erythroblasts we aimed for a rapid  
224 induction of eIF2 phosphorylation that minimalizes secondary effects on mRNA expression, stability or



225 translation. Depletion of iron and heme to activate HRI is a relatively slow process. Average phosphorylation of  
226 eIF2 was 2-fold increased upon a 90 minute treatment of erythroblasts with 2.5  $\mu\text{g}/\text{ul}$  tunicamycin (Tm) (Fig  
227 1A). Phosphorylation of eIF2 is known to reduce mRNA translation in general [10]. To assess the protein  
228 synthesis rate we measured incorporation of the methionine analogue AHA (L-Azidohomoalanine) in  
229 erythroblasts during the 90 minute Tm treatment. Alexa Fluor 488, coupled to AHA, was measured in fixed and  
230 permeabilised erythroblasts by flow cytometry. Tm treatment reduced de novo protein synthesis by 35% (Fig  
231 1B). To examine whether the reduced protein synthesis rate was due to decreased translation initiation, the  
232 polyribosome profile of Tm-treated cells was compared to untreated cells. (Fig 1C). The area under the curve  
233 was quantified for 80S and all polysome peaks independently. During Tm treatment the 80S peak and the peak  
234 of the first polysome significantly increased (Fig 1D). A shift from heavy towards light polyribosomes and an  
235 increase in the 80S monosome peak in Tm-treated cells indicated reduced polysome recruitment. Notably, we  
236 do not observe an increase in free ribosomes, rather an accumulation of transcripts with 1 or 2 assembled  
237 ribosomes. Together, the results confirm that Tm treatment of erythroblasts induced eIF2 phosphorylation and  
238 reduced mRNA translation.

239

240 **Fig 1. Phosphorylation of eIF2 reduces protein synthesis.** (A) Murine erythroblasts (line 15.4) were left  
241 untreated (-) or treated for 90 min with Tm (2.5  $\mu\text{g}/\text{ml}$ ). Western blots with total cell lysates were probed for  
242 phosphorylated (anti P-S51 eIF2) and total eIF2. Tm increased eIF2 phosphorylation 2-fold (B) Protein synthesis  
243 was measured by Click-it technology. Incorporated methionine analogue AHA was coupled to Alexa Fluor 488,  
244 and measured by flow cytometry (BD LSR-II). Tm treatment reduces de novo protein synthesis by 35% (average  
245 values, n=3, for every pair untreated cells were set to 1, error bar indicated StDev, star indicates  $p<0.05$ ) (C)  
246 Cell lysate was density separated on a 17-50% sucrose gradients and the absorbance at 254nm was measured  
247 throughout the gradient, which is a measure for RNA. The polysome profile of untreated cells (left) shows large  
248 polysomes with a relatively small monosome peak, whereas Tm-treated cells displayed an accumulation of light  
249 polyribosomes (representative plots from 3 independent experiments)

250

## 251 **Tm-induced changes in mRNA translation**

252

253 To investigate how eIF2 phosphorylation affects translation of individual transcripts in erythroblasts, we  
254 compared the ribosome density of transcripts in absence and presence of Tm. For this, ribosome footprint  
255 analysis and mRNA sequencing were performed in parallel on 3 biological replicates harvested on separate  
256 days. Following 90 min Tm treatment, cells were treated with 100 µg/ml CHX for 5 min to stall elongating  
257 ribosomes. Cells were then harvested for ribosome footprint (RFP) and mRNA sequencing analysis. For RFP  
258 analysis the cell lysates were treated with RNase-I, after which the resulting monosomes were purified on  
259 sucrose gradients, and RNA was isolated. The rRNA fragments were removed with beads, the protected  
260 fragments were isolated by PAGE, and library preparation was performed as previously described for myoblasts  
261 [31]. The number of reads sequenced per replicate was comparable in all replicates (~15 million, S1 Table). We  
262 used STAR to map reads to the genome, because of its capacity to correctly map short reads on either side of  
263 an intron. On average, 70-80% of reads mapped to genomic locations, 20-30% of reads were too short and  
264 therefore discarded. The modal RFP length was 30-32 nucleotides (S1A Fig). The presence of two populations  
265 with distinct footprint length may reflect the two rotating positions of the ribosome and implies that CHX did  
266 not completely stall elongation [39]. Reads were evenly distributed along all chromosomes, which implied that  
267 rRNA fragments were efficiently removed (S1B Fig). CHX stalls ribosomes, but enables preinitiation complexes  
268 to assemble and reach the start codon. CHX-induced accumulation of reads at start codons may be enhanced  
269 by Tm [40]. To investigate whether CHX induced an accumulation of reads at start codons we plotted CHX reads  
270 20 nt upstream or downstream of the start codons of the triplicates separately. This indicated that the majority  
271 of the protected fragments start at position -13 (frame 3) from the start codon, instead of the commonly  
272 observed position -12 (frame 1). Importantly, CHX reads were similarly distributed along the start codon in Tm-  
273 treated and untreated cells (S1C Fig). These results showed that the combined Tm and CHX treatment did not  
274 induce severe side effects during stress. Metagene analysis of the protected fragments indicated that the  
275 majority of the RFPs are in frame 3 (S1C Fig). Using the same protocol on myoblasts, we previously found frame  
276 1 as the common frame, which may indicate a change in ribosome composition in erythroblasts that makes it  
277 difficult to digest the last nucleotide [31,41]. This periodicity is also comparable to previous reports [14].

278 To use ribosome density as a proxy for protein synthesis in response to Tm-induced eIF2  
279 phosphorylation, we addressed RFPs in the annotated 5'UTR and the protein coding ORF (CDS) separately. RFPs  
280 were mapped to the start of the protected fragment at -13 of the P-site. By consequence, the first 4 codons of  
281 the CDS mapped to the 5'UTR and are omitted from the analysis of ribosome density on the CDS. We compared

282 the 2Log normalized RFP reads (cpm) of the CDS of all transcripts in Tm-treated erythroblasts to untreated cells  
283 (Fig 2A; S2 Table). Ribosome density on the CDS of the classical examples *Atf4* and *Ddit3/Chop* was increased in  
284 Tm-treated erythroblasts compared to untreated cells. Transcripts with a more than average reduced ribosome  
285 reads due to Tm treatment included, among others, *Mlt1*, *Csde1*, *Dym* and *Pabpc1* (Fig 2A).

286

287 Tm treatment changes mRNA translation through eIF2 phosphorylation [42], and affects gene transcription  
288 through activation of *Atf4*, *Atf6* and *Xbp1* [43]. To specifically define the effect on mRNA translation, RFP reads  
289 must be corrected for mRNA expression. Aliquots of the same cell samples were processed for polyA+  
290 transcriptome analysis. mRNA reads were normalized (cpm), transcripts with an average read intensity <10  
291 cpm were filtered out. The 2Log transformed mRNA reads derived from Tm-treated and control cells were  
292 compared. The short Tm treatment hardly induced changes at the RNA level (Fig 2B, S2 Table), although  
293 transcription of some genes, among which *Herpud1* and *Ddit3*, was upregulated by Tm.

294 Combining RFP and mRNA sequencing allows for a more accurate comparison of ribosome density. We  
295 employed a statistical model that examines the relationship between RFP and RNA reads (i.e. ribosome  
296 density) for each cell sample and calculates the probability that this relation is similar for Tm-treated and  
297 control samples (each in triplicate). At a false discovery rate (FDR) of 1%, Tm treatment increased the ribosome  
298 reads in 147 transcripts, and decreased the ribosome reads in 337 (Fig 2C; S2 Table). For these transcripts we  
299 calculated the fold change (FC) in RFP and in mRNA reads of Tm-treated over control cells from the average  
300 cpm (Fig 2C, S2 Table). As expected, Tm treatment increased the translation of *Atf4* and *Ppp1r15a*, with a  
301 limited change in transcription. Tm increased *Ddit3* mRNA expression, but also significantly increased its  
302 translation (FC increase in RFP significantly higher than in RNA-seq). Other notable translationally upregulated  
303 transcripts were *Ibtk* and *Ifrd1/Tis7*. Among the translationally downregulated transcripts during stress were  
304 *Csde1* and *Dym*. Interestingly, *Herpud1* stands out because its transcription was increased, whereas its  
305 translation rate lagged behind (Fig 2D).

306

307 **Fig 2. Tm treatment alters ribosome density on selected transcripts.** (A-B) Murine erythroblasts (line 15.4)  
308 were left untreated (-) or treated for 90 min with Tm (2.5 µg/ml). samples were harvested and processed for  
309 both ribosome footprinting (A, ribo reads) and polyA+ RNA sequencing (B, RNA expression). Sequence reads of  
310 3 biologically independent experiments were normalized and averaged. For RFP reads we applied a threshold

311 of, on average, 1 read per condition (A), for RNAseq a threshold of, on average, 10 reads per condition (B). For  
312 few dots, representing known targets of eIF2 phosphorylation, the transcript name is indicated. (C-D) A  
313 statistical interaction model indicated differential ribosome density on 484 transcripts at a FDR <01%, indicated  
314 as red dots. Dashed gray line indicates the area where translation follows transcription. (D) The fold-change  
315 (FC) in ribo reads (Tm-treated average reads/untreated average reads; Tm/Untr) was plotted against the FC  
316 Tm/Untr in RNA expression. Figures are based on data presented in S2 Table.

317

## 318 **Pathways that were affected by the Tm treatment**

319

320 We investigated which pathways were altered by transcripts with significantly altered ribosome density using  
321 overrepresentation analysis (ORA) with Genetrait2 [44]. Increased ribosome density was foremost associated  
322 with transcripts encoding proteins of mitochondria, mitochondrial and endoplasmic reticulum components  
323 (enrichment  $p < 10^{-6}$ ), followed by transcription complex ( $p = 1.6 \times 10^{-3}$ ) (S3 Table). [45]. Among molecular  
324 processes, transcriptional (co)activator complexes were most enriched ( $p = 1.3 \times 10^{-4}$ ). The stress response factors  
325 Atf4 and Ddit3 directly bind DNA to induce transcripts involved in cell survival or apoptosis [43]. The  
326 transcription factors Gtf2h, Mbd3, JunB and Kmt2e, were also enriched among transcripts with increased  
327 ribosome density. For transcripts with more than average decreased ribosome density, the top 30 pathways  
328 are shown in S4 Table, according to the adjusted p-value. Among molecular mechanisms, the most enriched  
329 transcripts were associated with kinases, and control of kinase activity ( $p < 10^{-10}$ ). The second most enriched,  
330 and independent molecular function was again transcription activation and chromatin ( $p = 10^{-9}$ ). In conclusion,  
331 prolonged phosphorylation of eIF2 will reprogram erythroblasts through altered expression of multiple  
332 transcription factors, which may stabilise a “stress phenotype” of erythroblasts.

333

334 *Detection of translation initiation sites.* In parallel with the CHX treatment, cells were treated with 2µg/ml  
335 Harringtonine (Ht) for 7 min to stall initiating ribosomes at start codons, while associated ribosomes complete  
336 translation and run off the transcripts. Following quality control, we obtained 11 to 15 million reads per  
337 individual sample (triplicate experiments with and without Tm) of which an average of 60% could be mapped to  
338 the genome using STAR (S1 Table). We combined STAR with a previously described script that maps the first

339 nucleotide of the RFP and predicts the corresponding translated codon [31]. Similar to the CHX-stabilised RFPs,  
340 also the Ht-stalled RFPs mainly started in frame 3 (S2 Fig). Accordingly, most protected reads started at position  
341 -13 relative to the annotated start codon (Fig 3A). Because test runs already showed the preferential protection  
342 of 13 nt, we had increased the RNase-I concentration compared to the original protocol that yielded reads  
343 starting in >80% at the -12 nucleotide position [31]. This did not make a difference in the length of the pattern  
344 of protected fragments. We separated protected fragments according to read length, but longer and smaller  
345 fragments were similarly distributed over -12 and -13 (data not shown). Therefore, in our TIS peak detection,  
346 we called peaks at both positions.

347         The cumulative reads of the triplicate for each condition, as mapped with STAR, were entered into the  
348 previously developed peak calling algorithm to identify translation initiation sites (TIS) [31]. Based on their  
349 position in the consensus transcript, peaks were segregated to 5'UTR TISs, annotated start codon TISs, TISs in  
350 the CDS, or in the 3'UTR. Peak calling was performed both with a setting of peaks at 12nt and at 13nt from the  
351 read start. Peaks were assigned to AUG, CUG, GUG or UUG start codons at either +12 or +13 from the start of  
352 the protected fragment. All other peaks were assigned to the codon at the +13 position counted from the top  
353 of the peak. A total of 1940 and 2175 TISs were identified in the annotated 5'UTRs of transcripts in untreated  
354 and Tm treated cells, respectively (S5 Table). From all 5'UTR TISs, 14% were mapped to an AUG codon, 25 and  
355 23% to a CUG codon, 9 and 8% to GUG, and 5 and 3% to UUG in untreated and Tm-treated samples,  
356 respectively (Fig 3B, S5 Table). The CDS of untreated and Tm-treated cells revealed 1935 and 2045 TISs,  
357 respectively. In the CDS the AUG TISs (12 and 15%) were more abundant than CUG TISs (6 and 7%) (Fig 3B, S6  
358 Table). The preference for CUGs in the 5'UTR, and for AUGs in the CDS is similar to what has been reported  
359 [25,31]. Overall 53 and 47% of TISs in the 5'UTR were [A/C/G/U]UG startcodons, but these codons only  
360 comprised 23 and 26% of all TISs in the CDS. Interestingly, the remainder of the peaks in both the 5'UTR and  
361 the CDS was not randomly distributed. Of all TIS peaks in the 5'UTR 24% mapped to triplets encoding the large,  
362 and positively charged amino acids Arginine (R) and Lysine (K). In the CDS, 28 and 30% of all peaks mapped to  
363 triplets encoding R or K (Fig 3B). To assess whether these are specific artefacts of the Ht treatment, or whether  
364 ribosomes pause at these codons, we compared Ht and CHX RFPs in the UCSC web browser. As an example, we  
365 show *Abce1* in which we found a Ht peak mapping to an AGG codon, however no CHX reads were present on  
366 this location (S3 Fig). The selective presence of the peaks in the Ht track indicated that these are Ht artefacts  
367 and not ribosome pausing sites.

368

369 **Fig 3. Characterisation of translation initiation sites (TIS), RFP obtained from cells treated with Harringtonine**

370 **(Ht; 7 min. 2µg/ml)** (A) The start of the protected RFP fragment, was mapped relative to the the annotated  
371 start codon. The start codon is located on position 0, 1, 2 and represents the P-site of the ribosome (because  
372 Ht blocks the E-site). The number of RFP reads starting at each position relative to the start codon is indicated  
373 (B) mapped Ht RFP were analysed with a peak calling program to define potential TIS in the 5'UTR (top) or CDS  
374 (bottom) in cells treated with Tm (right side) or untreated (left side). In the 5'UTR almost half of the detected  
375 TIS represented canonical (AUG) and noncanonical (CUG, UUG, GUG) startcodons, whereas only ~25% of all  
376 peaks in the CDS represented canonical or noncanonical start codons. The amino acid (1 letter) code of non-  
377 start codons was added to the codons that were most frequently detected as putative TIS. Exact percentages  
378 and codons are presented in supplemental Table S6. (C) The number of Ht peaks (potential TIS) that were  
379 detected in the annotated 5'UTR of individual genes (U: no TIS detected).

380

381

382 **Control of mRNA translation is poorly predicted by uORFs**

383

384 In the majority of transcripts we detected TISs in the 5'UTR. The 1940 TISs assigned to the 5'UTR of transcripts  
385 in untreated erythroblasts corresponded to 1467 genes, as some transcripts carry several mapped TISs. In Tm-  
386 treated erythroblasts, 2175 TISs in the annotated 5'UTR corresponded to 1666 genes. However, some of these  
387 peaks can be Ht-induced artefacts. Therefore, when we only consider [A/C/G/U]UG start codons as real TISs,  
388 TISs were detected in 867 transcripts in untreated erythroblasts and in 907 transcripts in Tm-treated  
389 erythroblasts. In most transcripts we detected 1 TIS. The maximum number of detected TISs in the 5'UTR was 4  
390 in the case of *Eri3* (*Exoribonuclease Family Member 3*) (Fig 3C, S5 Table). Taken together this means that uORF  
391 translation is widespread among expressed genes in both conditions.

392

393 In theory, comparison of TIS peak intensities corresponding to annotated start codons should  
394 validate the differences in ribosome density. Increased or reduced ribosome density should be mirrored by  
395 increased or reduced peak height on the start codon. However, start sites hardly accumulate reads when they  
are located downstream of an uORF, and the division of the peak over the -12 and -13 position also

396 complicated quantitative analysis. The analysis of ribosome density was much more accurate than an analysis  
397 of peaks on annotated start sites. Therefore we focussed in the presence of unexpected start sites within the  
398 CDS that may give rise to proteins with distinct N-termini. We considered all genes with at least 1 observed  
399 [A/C/G/U]UG consensus start codon TIS in the 5' UTR. For 683 genes we identified consensus start codon TISs  
400 under both control and Tm-treated conditions (Fig 4A, blue, bold numbers). The high overlap (79% of the  
401 lowest number) is expected, because the first TIS peak accumulates during Ht treatment while the formation of  
402 pre-initiation scanning complexes and scanning from the cap continues. For TISs in the CDS we also only  
403 considered [A/C/G/U]UG TISs. TISs in the protein coding domain are often an underestimation, because stalling  
404 of ribosomes at subsequent start codons depends on scanning complexes that had passed the initial TIS at the  
405 start of Ht treatment. Among the 683 transcripts with a TIS detected in the 5'UTR of transcripts from both Tm-  
406 treated and untreated erythroblasts, we detected a TIS in the CDS of 41 transcripts: 21 TISs in the CDS of  
407 transcripts of both TM-treated and untreated condition, 12 TISs only in the transcripts of Tm-treated cells, and  
408 8 TISs only in transcripts of control cells. (Fig 4A).

409 A detected peak in the coding sequence may indicate translation of an ORF that leads to a protein  
410 isoform. An example is *Transcription factor cp2 (Tfcp2)* which is translated from the annotated start codon  
411 embedded in a strong Kozak consensus sequence. A second very strong TIS peak maps downstream of the start  
412 codon in the CDS. However, it does not correspond to a N-terminally truncated protein but to a 9 codon small  
413 ORF (S4 Fig), which appeared to be the case for more peaks in the CDS.

414 To assess which TISs are actually affected by Tm exposure, we investigated whether Tm treatment  
415 changed the peak intensity ratio between TIS peaks within a transcript as previously described [31]. The ratio  
416 between triplicate TIS peak reads at distinct positions within a gene was compared between untreated and Tm-  
417 treated cells. At a p-value less than 0.01 few transcripts revealed differentially employed TISs in their 5'UTR (S7  
418 Table). For example, the ratio between the TIS detected in the 5'UTR of *Ranbp1* and the TIS of the annotated  
419 CDS start codon differed significantly dependent on Tm treatment (S5 Fig). Interestingly, *Ranbp1* RNA  
420 expression in erythroid progenitors is high compared to CD34+ cells [46]. In conclusion, we did not detect  
421 major changes in the expression of protein isoforms upon phosphorylation of eIF2.

422 Next we investigated the role of uORFs in the quantitative control of RNA translation. We  
423 hypothesized that uORFs render translation of the protein coding ORF more sensitive to eIF2 phosphorylation.

424 To assess whether increased, or decreased ribosome density in the CDS upon eIF2 phosphorylation is due to  
425 uORF translation, we considered transcripts with at least 1 detected TIS peak.

426 We divided transcripts with at least 1 TIS, into pools based on i) FDR interaction term significance for  
427 translation efficiency in response to Tm treatment and ii) whether ribosome density was increased or reduced  
428 (S2 Table, Fig 4B). As a control group of transcripts that were not specifically affected by eIF2 phosphorylation,  
429 we considered transcripts with a FDR>0.5 and at least 1 [A/C/G/U]UG TIS detected in absence and presence of  
430 Tm. In this group 77% of transcripts was without TIS, and 15% harboured at least 1 TIS in the 5'UTR both in  
431 absence and presence of Tm (Fig 4B). Surprisingly, this distribution of transcripts with or without TISs in the  
432 5'UTR was the same for the genes in which ribosome density was increased (Pearson's Chi-square p-value not  
433 significant). Among the transcripts with increased ribosome density at a FDR<0.05 19% contained a TIS (12%  
434 under both conditions), and among transcripts with more than average decreased ribosome density (FDR<0.05)  
435 22% contained a TIS (15% under both conditions) (Fig 4B). These results suggest that translation of an uORF  
436 does not seem to be a strong predictor of either quantitative or qualitative mRNA translation.

437

438 **Fig 4. Distribution of TIS in the 5'UTR and CDS of transcripts dependent on Tm treatment.** (A) Venndiagram  
439 showing transcripts with TIS detected in untreated cells (green), and/or Tm-treated cells (brown), and detected  
440 in the 5'UTR (light color, any TIS) or in the CDS (darker color; start codons only (AUG/CUG/UUG/GUG)). Bold  
441 blue numbers are transcripts with at least one predicted TIS in the 5'UTR under both conditions; predicted TIS  
442 in the CDS of these transcripts may give rise to alternative proteins dependent on Tm treatment. (B) total  
443 transcripts (black circle) and transcripts with TIS detected in the 5'UTR of untreated (green circle), and/or Tm-  
444 treated cells (brown circle) with Tm-induced increased ribosome density (red squares on top, FDR<0.01 or  
445 <0.05); similar ribosome density (orange, FDR>0.5); or reduced ribosome density (blue squares on bottom;  
446 FDR<0.01 or FDR<0.05). Both transcript numbers and percentage are indicated.

447

448 **Long uORFs with a CUG start codon occur commonly in transcripts with Tm-**  
449 **enhanced translation**

450



451 For individual transcripts, the translation of uORFs can be crucial for proper regulation. For transcripts of which  
452 translation was up- or more than average downregulated in response to Tm treatment, we established the TIS  
453 positions (Ht-induced TIS peaks) and the sizes of corresponding uORFs (RFPs protected in presence of CHX) (Fig  
454 5). We first analysed 10 transcripts with Tm-increased ribosome density and upstream TISs (Fig 5A). We  
455 detected 14 TIS in the 5'UTR of these 10 transcripts: 2 UGU, 6 CUG and 6 AUG codons. From the 6 AUG codons  
456 4 mapped to the known targets *Atf4*, *Ddit3* and *Ifrd1*. Thus, the novel, experimentally determined TISs were  
457 mainly non AUG. These non-AUG TISs that we established experimentally are hard to predict, particularly when  
458 they occur in a poor Kozak consensus sequence (e.g. the Cag CUG C start codon in *Mbd3*).

459 The mechanism employed by *Atf4*, a small uORF followed by an inhibitory uORF overlapping the  
460 protein codon TIS, appeared unique for *Atf4*. In only two other transcripts small uORFs were translated (*Hax1*  
461 and *Gtf2h5*), and in only one transcript a second uORF overlapping the protein start codon was translated  
462 (*Kmt2e*). Strikingly, the annotated start codon of *Hax1* was skipped, and an AUG codon 120 nt downstream was  
463 used as the TIS for *Hax1* coding frame. The GWIPS website (<http://gwips.ucc.ie/>) [47] revealed that this occurs  
464 in most mouse cells. The novel TISs in *Mbd3* and *Ubxn2a* appeared to be in frame with the known CDS and  
465 initiated an N-terminally extended protein isoform. Comparison with global data on the GWIPS website  
466 indicated that this is common for *Mbd3* in mouse cells. In contrast, most cell types are protected from the  
467 extension of *Ubxn2a* by a large uORF that ends just 1 codon upstream of the TIS. This uORF was hardly  
468 expressed in erythroblasts according to both Ht- and CHX-induced RFPs. The N-terminally extended isoforms of  
469 *Mbd3* and *Ubxn2a* are not conserved between mouse and human.

470 In five transcripts one or two long uORFs were translated, four of these are >90% conserved between mouse  
471 and human. These uORFs are also translated in other celltypes (GWIPS data), although at different ratios.  
472 Strikingly, an AUG codon within the first long uORF of *Cdc42se2* is the major TIS detected in most other cells. In  
473 our data this was a minor start, and we found a major contribution of the two long uORFs, both in Ht- and in  
474 CHX-arrested RFPs. The TIS of the first uORF of *Pnrc2* is hardly detected in other cell types (GWIPS). In absence  
475 of Tm, we detected less CHX-stabilised RFP in the first uORF compared to the second uORF (S6 Fig). Tm, that  
476 induced a 1.9-fold increase in *Pnrc2* translation, changed the relative density of ribosomes on the two uORFs in  
477 favour of uORF1, which is even more distant from the global aggregate on the GWIPS site.

478

479 **Fig 5. Position and length of uORFs in the 5'UTR of transcripts subject to Tm-controlled translation.** (A, B) Top  
480 line indicates the distance in nt upstream of the main annotated start codon. The same relative size is used for  
481 transcripts with Tm-enhanced translation (A), or Tm-decreased translation (B), except for the last two  
482 transcripts for which size was condensed 2-fold as indicated by a separate size marker. The collapsed  
483 annotated protein ORF is shown by a grey interrupted box, with the protein name directly at the rightside.  
484 Numbers between brackets indicate the size of the main annotated protein in amino acids. Adjacent boxes with  
485 a fence pattern on the left of the "protein box" indicate a N-terminal extension of the protein. A fenced box at  
486 the back ground as shown for Hax1 indicates that this part of the annotated protein seems not translated. All  
487 uORF are indicated by open boxes, and the start codon is written at the start of the box including its Kozak  
488 context. The dashed line below indicates areas that are >90% conserved between mouse and man. A small  
489 cross below the start codon in a conserved area indicates that the start codon is not conserved. Conserved  
490 areas were identified by Blastn with the mouse sequence on the human transcriptome.

491

## 492 **A long 5'UTR with a short uORF harbouring an AUG TIS is common in** 493 **transcripts undergoing Tm-reduced translation**

494

495 The start codon, length, and position of uORFs in transcripts with more than average Tm-decreased translation  
496 was different from the uORFs found in upregulated transcripts (Fig 5). Whereas we detected many long uORFs  
497 in transcripts with Tm-enhanced translation, all uORFs detected in transcripts with Tm-reduced translation are  
498 short. In 11 transcripts (>2-fold reduction compared to average) we observed 15 TISs, 11 of which were AUG  
499 codons. For 3 of the 11 transcripts we observed an N-terminal extension (*Iqgap1*, *Podxl*, *Csde1*), that are also  
500 observed for other cell types but in a lower frequency (GWIPS comparison). The uORF of *Chd1* is not detected  
501 in other cell types, whereas an additional, further upstream, uORF was detected for *Ppm1a* and *Csde1* in many  
502 other cell types, but not in our erythroblasts (GWIPS comparison). The 5'UTR of seven transcripts is >90%  
503 conserved between mouse and man, suggesting conserved mechanism of translation control. Notably, 9/10  
504 transcripts subject to Tm-enhanced translation encoded short proteins (average of all encoded proteins is 368

505 amino acids). In contrast, the average of protein size encoded by transcripts subject to Tm-decreased  
506 translation is 1197 amino acids.

507

## 508 Discussion

509

510 Iron deficiency, oxidative stress, or the presence of unfolded proteins in erythroblasts activates the eIF2 kinases  
511 HRI and PERK, respectively, which results in phosphorylation, and thereby inactivation, of eIF2. This decreases  
512 overall mRNA translation to prevent for instance the accumulation and aggregation of globin polypeptides in  
513 absence of iron and heme [9]. To characterise the molecular pathways and cellular processes that respond to  
514 eIF2 phosphorylation in erythroblasts we combined ribosome profiling and transcriptome analysis to detect  
515 transcripts with increased ribosome density, or with a more than average decreased density of elongating  
516 ribosomes upon eIF2 phosphorylation. We found, among others, known components of the ISR pathway to be  
517 increased in translation, such as *Atf4*, *Ddit3*, and *Ifrd1*, but also transcripts that are less well known to be  
518 translated upon eIF2 phosphorylation including *Prnc2*, that encodes a protein involved in recruitment of  
519 transcripts to P-bodies for subsequent degradation [48]. On the other hand, stress also led to more than  
520 average downregulation of translation for a set of transcripts that included *Csde1* and *Dym*. Whereas  
521 stabilisation with CHX identified elongating footprints, the treatment of erythroblasts with Ht identified  
522 footprints at translation initiation sites. Combination of CHX and Ht RFPs showed that the presence of a  
523 translated uORF did not predict the sensitivity of a particular mRNA during eIF2 phosphorylation. The high  
524 degree of conservation between the 5'UTR of man and mouse suggests that the translation mechanism may be  
525 more complex than only the presence of uORFs. Strikingly, transcripts with Tm-enhanced translation contained  
526 long, conserved uORFs that often started with a CUG start codon, whereas transcripts with Tm-reduced  
527 translation contained short uORFs starting from an AUG codon.

528

529 Some of the transcripts that we found to be translationally upregulated upon Tm treatment of erythroblasts  
530 were recently linked to eIF2 phosphorylation in HEK293 cells. These transcripts encoded proteins involved in  
531 the ISR such as *Atf4*, *Atf5*, and *Ppp1R15a/Gadd34*, *Ibtk*, and *Tis7/IFRD1* [14,49]. The ISR is highly conserved  
532 between eukaryotes, from yeast to mammals [50]. Several ribosome profiling datasets were published that

533 address the ISR, but the data are difficult to compare. Lack of uniformity in methods, in induction of eIF2  
534 phosphorylation, in statistical analysis and in cell types complicates comparisons between these studies.  
535 Nevertheless, we compared the transcripts with increased translation in erythroblasts to transcripts with  
536 increased ribosome density in response to arsenite treatment of HEK293 cells [14]. Whereas we (i) identified  
537 differential ribosome density in erythroblasts, and (ii) used a statistical interaction model to compare RFP and  
538 RNAseq reads. Andreev et al. (i) calculated translation efficiency in HEK293 cells, and (ii) determined the Z-  
539 score for the fold-change in translation efficiency. They considered transcripts with a Z-score>4 as significantly  
540 upregulated. For this comparison we considered the transcripts with a Z-score>3 in the dataset of Andreev et  
541 al. (S7 Fig). Strikingly, the overlap between differentially translated transcripts was limited to *Atf4*, *Atf5*,  
542 *Ppp1R15a*, *Slc35A4* and *Ifrd1*. There was a clear separation between transcripts that were differentially  
543 translated in HEK293 cells or in erythroblasts. This difference seems too large to be due to technical differences  
544 and may rather reflect an essential difference between these two cell types. This implies that the ISR  
545 downstream of eIF2 phosphorylation is different in erythroblasts compared to HEK293 cells. The activity and  
546 specificity of eIF2 is modulated by the association with eIF1 and eIF5 [51]. eIF1 is upregulated in response to  
547 SCF-induced erythroblast expansion, whereas eIF5 is upregulated during differentiation to hemoglobinised,  
548 enucleated red blood cells [22]. Interestingly, cancer cells were also shown to modify their response to eIF2  
549 phosphorylation by expression of the alternative translation initiation factor eIF2A [52]. The effect of eIF2A  
550 only becomes apparent when eIF2 is limiting [53]. Thus, depending on the expression levels of various  
551 translation initiation factors, each cell may respond differently to eIF2 phosphorylation, because translation of  
552 uORFs and protein coding ORFs will depend on the combination of eIF2 availability plus the modulation of its  
553 activity and specificity by associated initiation factors.

554

555 Interpretation of RFP data sets, and particularly of translation initiation sites is complicated by several factors  
556 including (i) sequence depth, (ii) ligation bias, and (iii) TIS peak imbalance. First, each read is a single count on a  
557 single codon. A substantial number of reads need to map to each codon position to identify changes in codon  
558 usage that are statistically significant. From samples treated with CHX we obtained a total of >45 million reads  
559 for the combined triplicate. Statistical analysis uses the individual experiments. Thus, peaks that can be  
560 discerned in the UCSC web browser may still lack statistical power. Second, we observed that ligation of the  
561 small RFP fragments to adapter oligonucleotides is very sensitive to bias and that this bias depends on the

562 ligation kit. We detected the start codon of the first uORF of *Atf4* in pilot experiments, but the final experiment  
563 only showed a relatively low number of reads at this position. We cannot exclude the possibility that the use of  
564 a different adapter ligation kit introduced bias in the ligation step. In agreement with this supposition, ribo-seq  
565 profiles of *Atf4* also show a loss of uORF1 in other studies that used the same library prep kit [54,55] compared  
566 to studies that use different methods, as shown in the GWIPS-viz genome browser [47]. Third, the detection of  
567 TISs following Ht treatment has a strong bias towards the most upstream uORF. Ht or CHX do not inhibit the  
568 association of the pre-initiation scanning complex at the cap, and scanning to the first start codon. During  
569 treatment, this first peak continues to grow, while all other peaks downstream of the first peak depend on  
570 scanning complexes present between the peaks at the start of the treatment.

571 Finally, we also observed an enrichment of Ht peaks at codons that code for Arginine (R) and Lysine  
572 (K). These amino acids are positively charged, and they are among the bulkiest amino acids. The triplets coding  
573 for other bulky amino acids (tyrosine, Y; Phenylalanine, F) are not enriched among the peaks. Having a  
574 positively charged (large) amino acid at the P-site of the ribosome may either create more space at the A-site  
575 to bind Ht, or it may pause ribosome progression. In the latter case ribosome density should also be increased  
576 upon CHX treatment. Therefore, TIS peaks are subject to bias and need to be interpreted with caution. In  
577 combination with elongating RFPs, however, it is a powerful method to identify uORFs. Ribosome profiling on  
578 other cell types reported different biases [25,56]. This may be due to technical details such as bias in the  
579 isolation and ligation of protected fragments, but it could also hint at a cell type specific composition of the  
580 pre-initiation scanning complex and elongating ribosomes.

581 The data also show that many alternative start codons, particularly CUG, are used as TISs. Therefore,  
582 prediction of uORF translation from the primary transcript sequence is difficult, if not impossible. Experimental  
583 TIS analysis such as the Ht treatment to stall ribosomes at start codons, is needed to understand how TIS may  
584 contribute to control translation in specific transcripts. Selective translational control by eIF2 is performed  
585 through differential start codon recognition and the presence of uORFs on 5' UTRs of specific mRNAs [8].  
586 However, in our proteotoxic stress model we did not find an enrichment of uORF containing transcripts. The  
587 translation of uORFs appeared widespread.

588

589 The transcripts with significantly altered translation compared to the average change in translation caused by  
590 Tm were enriched for CDS giving rise to transcription factors, like Pnrc2, Tis7, Kmt2e and JunB. Pnrc2 interacts

591 with the glucocorticoid receptor to induce mRNA decay of some transcripts [57]. Glucocorticoids are important  
592 for expansion of the erythroblast compartment upon induction of stress erythropoieses [58]. Interestingly,  
593 JunB was reported to drive erythroid differentiation [59]. Increased expression of JunB in response to eIF2  
594 phosphorylation may be a convergence node in erythropoiesis for ER-stress and activation of stress kinases of  
595 the MAPkinase pathway similar to what was found for pancreatic cells [60]. Tis7 was found to be upregulated  
596 in chicken erythroid cells during hypoxic stress [61]. Kmt2e regulates cell cycle progression in myoblasts [62].  
597 These transcription factors could also be involved in activating the transcription of other stress responsive  
598 genes and induce a cell survival mechanism in erythroblasts.

599

600 In conclusion, translational control by eIF2 in erythroid cells is important for maintaining red blood cell function  
601 and survival. In this study we have used ribosome profiling to investigate which transcripts are translationally  
602 up or downregulated during ER stress in erythroblasts. Unexpectedly, uORFs are not enriched in these  
603 transcripts. We also observed [A/C/G/U]UG TISs within the CDS of 179 transcripts, and these were mostly short  
604 out-of-frame ORFs. Whether these are unimportant side effects due to leaky scanning of the CDS starting  
605 codon, whether their translation interferes with the translation of the CDS, or whether the encoded peptides  
606 are stable is not known and needs to be investigated. Future studies should be performed to gain more insight  
607 into control of translation by eIF2, and to understand the role of these encoded proteins in erythropoiesis.

608

#### 609 **Accession numbers**

610

611 Original sequencing results have been deposited in the BioProject Database under project ID PRJNA380970.

612

#### 613 **Data access for reviewers:**

614

615 UCSC browser session:

616 [https://genome.ucsc.edu/cgi-](https://genome.ucsc.edu/cgi-bin/hgTracks?hgS_doOtherUser=submit&hgS_otherUserName=ksm113&hgS_otherUserSessionName=TIS%20if)

617 [bin/hgTracks?hgS\\_doOtherUser=submit&hgS\\_otherUserName=ksm113&hgS\\_otherUserSessionName=TIS%20if](https://genome.ucsc.edu/cgi-bin/hgTracks?hgS_doOtherUser=submit&hgS_otherUserName=ksm113&hgS_otherUserSessionName=TIS%20if)

618 [rd1%20Har%20%26%20Chx](https://genome.ucsc.edu/cgi-bin/hgTracks?hgS_doOtherUser=submit&hgS_otherUserName=ksm113&hgS_otherUserSessionName=TIS%20if)

619

620 SubmissionID: SUB2489513

621 BioProject ID: PRJNA380970

622

623 BioSample accessions: SAMN06660139, SAMN06660140

624 <http://www.ncbi.nlm.nih.gov/biosample/6660139>

625 <http://www.ncbi.nlm.nih.gov/biosample/6660140>

626

## 627 **Acknowledgements**

628

629 We want to thank Dr E. van den Akker for critical reading of the manuscript, Drs Henk Buermans and Yavuz  
630 Ariyurek, Leiden Genome Technology Centre (LGTC), Leids Universitair Medical Centre (LUMC), for deep  
631 sequencing support.

632

## 633 **Funding**

634

635 This work was supported by the Landsteiner Foundation for Bloodtransfusion Research (LSBR) [projects 1140  
636 and 1239 to MvL].

637

## 638 **Conflict of Interest**

639 There are no conflicts of interest to report.

640

## 641 **References**

642

- 643 1. Gozzelino R, Arosio P. Iron Homeostasis in Health and Disease. *Int J Mol Sci.* 2016;17: 1–14.  
644 doi:10.3390/ijms17010130
- 645 2. Chung J, Chen C, Paw BH. Heme metabolism and erythropoiesis. *Curr Opin Hematol.*  
646 2012;19: 156–162. doi:10.1097/MOH.0b013e328351c48b
- 647 3. Chen J-J. Regulation of protein synthesis by the heme-regulated eIF2 $\alpha$  kinase: relevance  
648 to anemias. *Blood.* 2007;109: 2693–9. doi:10.1182/blood-2006-08-041830
- 649 4. Kühn LC. Iron regulatory proteins and their role in controlling iron metabolism. *Metallomics.*  
650 2015;7: 232–243. doi:10.1039/C4MT00164H
- 651 5. Horvathova M, Kapralova K, Zidova Z, Dolezal D, Pospisilova D, Divoky V. Erythropoietin-  
652 driven signaling ameliorates the survival defect of DMT1-mutant erythroid progenitors and  
653 erythroblasts. *Haematologica.* 2012;97: 1480–1488. doi:10.3324/haematol.2011.059550
- 654 6. Bandyopadhyay S, Brittenham GM, Francis RO, Zimring JC, Hod EA, Spitalnik SL. Iron-  
655 deficient erythropoiesis in blood donors and red blood cell recovery after transfusion: initial  
656 studies with a mouse model. *Blood Transfus.* 2017;15: 158–164. doi:10.2450/2017.0349-16
- 657 7. Lu L, Han A, Chen J. Translation Initiation Control by Heme-Regulated Eukaryotic Initiation  
658 Factor 2  $\alpha$  Kinase in Erythroid Cells under Cytoplasmic Stresses Translation Initiation Control  
659 by Heme-Regulated Eukaryotic Initiation Factor 2  $\alpha$  Kinase in Erythroid Cells under Cytopl. *Mol*  
660 *Cell Biol.* 2001;21: 7971–7980. doi:10.1128/MCB.21.23.7971
- 661 8. Hinnebusch AG. Molecular mechanism of scanning and start codon selection in eukaryotes.  
662 *Microbiol Mol Biol Rev.* 2011;75: 434–67. doi:10.1128/MMBR.00008-11
- 663 9. Chen J-J. Translational control by heme-regulated eIF2 $\alpha$  kinase during erythropoiesis. *Curr*  
664 *Opin Hematol.* 2014;21: 172–8. doi:10.1097/MOH.0000000000000030
- 665 10. Wek RC, Jiang H-Y, Anthony TG. Coping with stress: eIF2 kinases and translational control.  
666 *Biochem Soc.* 2006;34: 7–11. doi:10.1042/BST20060007
- 667 11. Vattem KM, Wek RC. Reinitiation involving upstream ORFs regulates ATF4 mRNA translation  
668 in mammalian cells. *PNAS.* 2004;101: 11269–11274.
- 669 12. Lu PD, Harding HP, Ron D. Translation reinitiation at alternative open reading frames regulates  
670 gene expression in an integrated stress response. *J Cell Biol.* 2004;167: 27–33.  
671 doi:10.1083/jcb.200408003
- 672 13. Palam LR, Baird TD, Wek RC. Phosphorylation of eIF2 facilitates ribosomal bypass of an  
673 inhibitory upstream ORF to enhance CHOP translation. *J Biol Chem.* 2011;286: 10939–49.  
674 doi:10.1074/jbc.M110.216093

- 675 14. Andreev DE, O'Connor PB, Fahey C, Kenny EM, Terenin IM, Dmitriev SE, et al. Translation of  
676 5' leaders is pervasive in genes resistant to eIF2 repression. *Elife*. 2015;4: 1–21.  
677 doi:10.7554/eLife.03971
- 678 15. Calkhoven CF, Muller C, Martin R, Krosi G, Pietsch H, Hoang T, et al. Translational control of  
679 SCL-isoform expression in hematopoietic lineage choice. *Genes Dev*. 2003;17: 959–64.  
680 doi:10.1101/gad.251903
- 681 16. Suragani RNVS, Zachariah RS, Velazquez JG, Liu S, Sun C-W, Townes TM, et al. Heme-  
682 regulated eIF2 $\alpha$  kinase activated Atf4 signaling pathway in oxidative stress and erythropoiesis.  
683 *Blood*. 2012;119: 5276–84. doi:10.1182/blood-2011-10-388132
- 684 17. Masuoka HC, Townes TM. Targeted disruption of the activating transcription factor 4 gene  
685 results in severe fetal anemia in mice. *Blood*. 2002;99: 736–745. doi:10.1182/blood.V99.3.736
- 686 18. Jousse C, Oyadomari S, Novoa I, Lu P, Zhang Y, Harding HP, et al. Inhibition of a constitutive  
687 translation initiation factor 2 alpha phosphatase, CREP, promotes survival of stressed cells. *J*  
688 *Cell Biol*. 2003;163: 767–775. doi:10.1083/jcb.200308075
- 689 19. Connor JH, Weiser DC, Li S, Hallenbeck JM, Shenolikar S. Growth Arrest and DNA Damage-  
690 Inducible Protein GADD34 Assembles a Novel Signaling Complex Containing Protein  
691 Phosphatase 1 and Inhibitor 1. *Mol Cell Biol*. 2001;21: 6841–6850.  
692 doi:10.1128/MCB.21.20.6841
- 693 20. Patterson AD, Hollander MC, Miller GF, Fornace AJ. Gadd34 Requirement for Normal  
694 Hemoglobin Synthesis. 2006;26: 1644–1653. doi:10.1128/MCB.26.5.1644
- 695 21. Harding HP, Zhang Y, Scheuner D, Chen J, Kaufman RJ, Ron D. Ppp1r15 gene knockout  
696 reveals an essential role for translation initiation factor 2 alpha (eIF2 $\alpha$ ) dephosphorylation in  
697 mammalian development. *PNAS*. 2009;106: 1–6.
- 698 22. Grech G, Blázquez-Domingo M, Kolbus A, Bakker WJ, Müllner EW, Beug H, et al. Igbp1 is part  
699 of a positive feedback loop in stem cell factor-dependent, selective mRNA translation initiation  
700 inhibiting erythroid differentiation. *Blood*. 2008;112: 2750–60. doi:10.1182/blood-2008-01-  
701 133140
- 702 23. Horos R, Ijspeert H, Pospisilova D, Sendtner R, Andrieu-Soler C, Taskesen E, et al. Ribosomal  
703 deficiencies in Diamond-Blackfan anemia impair translation of transcripts essential for  
704 differentiation of murine and human erythroblasts. *Blood*. 2012;119: 262–72.  
705 doi:10.1182/blood-2011-06-358200
- 706 24. Ingolia NT, Ghaemmaghami S, Newman JRS, Weissman JS. Genome-wide analysis in vivo of  
707 translation with nucleotide resolution using ribosome profiling. *Science*. 2009;324: 218–23.  
708 doi:10.1126/science.1168978
- 709 25. Ingolia NT, Lareau LF, Weissman JS. Ribosome profiling of mouse embryonic stem cells  
710 reveals the complexity and dynamics of mammalian proteomes. *Cell*. Elsevier Inc.; 2011;147:  
711 789–802. doi:10.1016/j.cell.2011.10.002
- 712 26. Von Lindern M, Deiner EM, Dolznig H, Amelsvoort MP, Hayman MJ, Mullner EW, et al.  
713 Leukemic transformation of normal murine erythroid progenitors  $\square$ : v- and c-ErbB act through  
714 signaling pathways activated by the EpoR and c-Kit in stress erythropoiesis. *Oncogene*.  
715 2001;20: 3651–3664.
- 716 27. Blázquez-Domingo M, Grech G, Von Lindern M. Translation Initiation Factor 4E Inhibits  
717 Differentiation of Erythroid Progenitors. *Mol Cell Biol*. 2005;25: 8496–506.  
718 doi:10.1128/MCB.25.19.8496
- 719 28. Pereboom TC, Bondt A, Pallaki P, Klasson TD, Goos YJ, Essers PB, et al. Translation of  
720 branched-chain aminotransferase-1 transcripts is impaired in cells haploinsufficient for  
721 ribosomal protein genes. *Exp Hematol*. ISEH - Society for Hematology and Stem Cells;  
722 2014;42: 394–403. doi:10.1016/j.exphem.2013.12.010
- 723 29. Salerno F, Paolini NA, Stark R, Von Lindern M, Wolkers MC. Distinct PKC-mediated  
724 posttranscriptional events set cytokine production kinetics in CD8+ T cells. *PNAS*. 2017;114:  
725 9677–9682. doi:10.1073/pnas.1704227114
- 726 30. Ingolia NT, Brar G a, Rouskin S, McGeachy AM, Weissman JS. The ribosome profiling strategy  
727 for monitoring translation in vivo by deep sequencing of ribosome-protected mRNA fragments.



- 728 Nat Protoc. 2012;7: 1534–50. doi:10.1038/nprot.2012.086
- 729 31. De Klerk E, Fokkema IFAC, Thiadens KAMH, Goeman JJ, Palmblad M, Den Dunnen JT, et al.  
730 Assessing the translational landscape of myogenic differentiation by ribosome profiling. *Nucleic*  
731 *Acids Res.* 2015;43: 4408–4428. doi:10.1093/nar/gkv281
- 732 32. Martin M. Cutadapt removes adapter sequences from high-throughput sequencing reads.  
733 *EMBnet.journal.* 2011;17: 10–12. doi:10.14806/ej.17.1.200
- 734 33. Dobin A, Davis CA, Schlesinger F, Drenkow J, Zaleski C, Jha S, et al. STAR: Ultrafast  
735 universal RNA-seq aligner. *Bioinformatics.* 2013;29: 15–21. doi:10.1093/bioinformatics/bts635
- 736 34. Robinson MD, McCarthy DJ, Smyth GK. edgeR: A Bioconductor package for differential  
737 expression analysis of digital gene expression data. *Bioinformatics.* 2009;26: 139–140.  
738 doi:10.1093/bioinformatics/btp616
- 739 35. McCarthy DJ, Chen Y, Smyth GK. Differential expression analysis of multifactor RNA-Seq  
740 experiments with respect to biological variation. *Nucleic Acids Res.* 2012;40: 4288–4297.  
741 doi:10.1093/nar/gks042
- 742 36. Wildeman M, Van Ophuizen E, Den Dunnen JT, Taschner PEM. Improving Sequence Variant  
743 Descriptions in Mutation Databases and Literature Using the Mutalyzer Sequence Variation  
744 Nomenclature Checker. *Hum Mutat.* 2008;29: 6–13. doi:10.1002/humu
- 745 37. Bates D, Mächler M, Bolker B, Walker S. Fitting Linear Mixed-Effects Models Using lme4. *J*  
746 *Stat Softw.* 2015;67. doi:10.18637/jss.v067.i01
- 747 38. Michel AM, Mullan JPA, Velayudhan V, O'Connor PBF, Donohue CA, Baranov P V.  
748 RiboGalaxy: A browser based platform for the alignment, analysis and visualization of  
749 ribosome profiling data. *RNA Biol.* Taylor & Francis; 2016;13: 316–319.  
750 doi:10.1080/15476286.2016.1141862
- 751 39. Lareau LF, Hite DH, Hogan GJ, Brown PO. Distinct stages of the translation elongation cycle  
752 revealed by sequencing ribosome-protected mRNA fragments. *Elife.* 2014;2014: 1–16.  
753 doi:10.7554/eLife.01257
- 754 40. Gerashchenko M V., Gladyshev VN. Translation inhibitors cause abnormalities in ribosome  
755 profiling experiments. *Nucleic Acids Res.* 2014;42: e134. doi:10.1093/nar/gku671
- 756 41. Simsek D, Tiu GC, Flynn RA, Xu AF, Chang HY, Barna M, et al. The Mammalian Ribo-  
757 interactome Reveals Ribosome Functional Diversity and Heterogeneity. *Cell.* Elsevier Inc.;  
758 2017;169: 1051–1057.e18. doi:10.1016/j.cell.2017.05.022
- 759 42. Prostko CR, Brostrom MA, Brostrom CO. Reversible phosphorylation of eukaryotic initiation  
760 factor 2 alpha in response to endoplasmic reticular signaling. *Mol Cell Biochem.* 1993;127-128:  
761 255–65. Available: <http://www.ncbi.nlm.nih.gov/pubmed/7935356>
- 762 43. Hetz C. The unfolded protein response  $\square$ : controlling cell fate decisions under ER stress and  
763 beyond. *Nat Rev Mol Cell Biol.* Nature Publishing Group; 2012;13: 89–102.  
764 doi:10.1038/nrm3270
- 765 44. Stöckel D, Kehl T, Trampert P, Schneider L, Backes C, Ludwig N, et al. Multi-omics enrichment  
766 analysis using the GeneTrail2 web service. *Bioinformatics.* 2016;32: 1502–1508.
- 767 45. Malhotra JD, Kaufman RJ. ER Stress and Its Functional Link to Mitochondria  $\square$ : Role in Cell  
768 Survival and Death. *Cold Spring Harb Perspect Biol.* 2011;3: a004424.
- 769 46. Fujishima N, Hirokawa M, Aiba N, Ichikawa Y, Fujishima M, Komatsuda A, et al. Gene  
770 Expression Profiling of Human Erythroid Progenitors by Micro-Serial analysis of Gene  
771 Expression. *Int J Hematol.* 2004;80: 239–45.
- 772 47. Michel AM, Fox G, Kiran AM, Bo C De, Connor PBFO, Heaphy SM, et al. GWIPS-viz  $\square$ :  
773 development of a ribo-seq genome browser. *Nucleic Acids Res.* 2014;42: 859–864.  
774 doi:10.1093/nar/gkt1035
- 775 48. Cho H, Kim KM, Kim YK. Human Proline-Rich Nuclear Receptor Coregulatory Protein 2  
776 Mediates an Interaction between mRNA Surveillance Machinery and Decapping Complex. *Mol*  
777 *Cell.* Elsevier Inc.; 2009;33: 75–86. doi:10.1016/j.molcel.2008.11.022
- 778 49. Baird TD, Palam LR, Fusakio ME, Willy JA, Davis CM, McClintick JN, et al. Selective mRNA  
779 translation during eIF2 phosphorylation induces expression of IBTK $\alpha$ . *Mol Biol Cell.* 2014;25:

- 780 1686–97. doi:10.1091/mbc.E14-02-0704
- 781 50. Hinnebusch AG. Translational regulation of yeast GCN4. *J Biol Chem.* 1997;272: 21661–  
782 21664. Available: <http://www.jbc.org/content/272/35/21661.short>
- 783 51. Nanda JS, Saini AK, Muñoz AM, Hinnebusch AG, Lorsch JR. Coordinated movements of  
784 eukaryotic translation initiation Factors eIF1, eIF1A, and eIF5 trigger phosphate release from  
785 eIF2 in response to start codon recognition by the ribosomal preinitiation complex. *J Biol*  
786 *Chem.* 2013;288: 5316–5329. doi:10.1074/jbc.M112.440693
- 787 52. Sendoel A, Dunn JG, Rodriguez EH, Naik S, Gomez NC, Hurwitz B, et al. Translation from  
788 unconventional 5' start sites drives tumour initiation. *Nature.* Nature Publishing Group;  
789 2017;541: 494–499. doi:10.1038/nature21036
- 790 53. Golovko A, Kojukhov A, Guan BJ, Morpurgo B, Merrick WC, Mazumder B, et al. The eIF2A  
791 knockout mouse. *Cell Cycle.* Taylor & Francis; 2016;15: 3115–3120.  
792 doi:10.1080/15384101.2016.1237324
- 793 54. Reid DW, Chen Q, Tay AS, Shenolikar S, Nicchitta C V. The Unfolded Protein Response  
794 Triggers Selective mRNA Release from the Endoplasmic Reticulum. *Cell.* Elsevier Inc. ;  
795 2014;158: 1362–1374. doi:10.1016/j.cell.2014.08.012
- 796 55. Reid DW, Tay ASL, Sundaram JR, Lee ICJ, Chen Q, George SE, et al. Complementary Roles  
797 of GADD34- and CReP-Containing Eukaryotic Initiation Factor 2  $\alpha$  Phosphatases during the  
798 Unfolded Protein Response. *Mol Cell Biol.* 2016;36: 1868–1880. doi:10.1128/MCB.00190-  
799 16.Address
- 800 56. Fritsch C, Herrmann A, Nothnagel M, Szafranski K, Huse K, Schumann F, et al. Genome-wide  
801 search for novel human uORFs and N-terminal protein extensions using ribosomal footprinting.  
802 *Genome Res.* 2012;22: 2208–2218. doi:10.1101/gr.139568.112.2208
- 803 57. Cho H, Park OH, Park J, Ryu I, Kim J, Ko J, et al. Glucocorticoid receptor interacts with  
804 PNRC2 in a ligand-dependent manner to recruit UPF1 for rapid mRNA degradation. *PNAS.*  
805 2015;112: 1540–1549. doi:10.1073/pnas.1409612112
- 806 58. Bauer A, Tronche F, Wessely O, Kellendonk C, Reichardt HM, Steinlein P, et al. The  
807 glucocorticoid receptor is required for stress erythropoiesis. *Genes Dev.* 1999;13: 2996–3002.
- 808 59. Jacobs-Helber SM, Abutin RM, Tian C, Bondurant M, Wickrema A, Sawyer ST. Role of JunB in  
809 erythroid differentiation. *J Biol Chem.* 2002;277: 4859–4866. doi:10.1074/jbc.M107243200
- 810 60. Gurzov E, Ortis F, Cunha D, Gosset G, Li M, Cardozo A, et al. Signaling by IL-1 b + IFN- $\gamma$  and  
811 ER stress converge on DP5 / Hrk activation  $\gamma$ : a novel mechanism for pancreatic  $\beta$ -cell  
812 apoptosis. *Cell Death Differ.* 2009;16: 1539–1550. doi:10.1038/cdd.2009.99
- 813 61. Dragon S, Offenhauser N, Baumann R. Fos Expression in Erythroid Cells of the Chick Embryo.  
814 *Am J Physiol Regul Integr Comp Physiol.* 2002;282: R1219–26.
- 815 62. Sebastian S, Sreenivas P, Sambasivan R, Cheedipudi S, Kandalla P, Pavlath GK, et al. MLL5,  
816 a trithorax homolog, indirectly regulates H3K4 methylation, represses cyclin A2 expression,  
817 and promotes myogenic differentiation. *Proc Natl Acad Sci.* 2009;106: 4719–4724.  
818 doi:10.1073/pnas.0807136106

819

## 820 **Supporting information**

821

822 **S1 Fig. Ribosome profiling data quality.** (A) Ribosomes were stabilised with CHX. Shown is the fitted line  
823 through the average values of three biological replicates harvested following Tm treatment or three control  
824 replicates. Error bars indicate standard deviation. (B) RFP fragments were mapped to the genome and the  
825 number of reads (all experiments combined) was enumerated per chromosome. Shown is the percentage of all  
826 reads mapping to the different chromosomes. (C) RFP sequence data were uploaded to the RiboGalaxy

827 webtool. The start of each RFP was mapped to the genome. The number of reads starting at position -20 to +50  
828 compared to the startcodon, and on position -50 to +20 compared to the stopcodon were calculated for reads  
829 of 32 nt. Reads in each frame are indicated by distinct colors. Red: frame 1, green: frame 2, blue: frame 3.  
830 Representative plots of one replicate of each condition is shown.

831

832 **S2 Fig. Harringtonine-induced RFP are mostly translated in frame 3.** We used STAR to map Ht-stabilized RFP to  
833 the genome, and used our previously described script to map the first nucleotide relative to the annotated  
834 reading frame. Shades of blue (a2, b2, c2) represent RFP from untreated cells, shades of orange (a4, b4, c4)  
835 represent RFP from Tm-treated cells.

836

837 **S3 Fig. Web browser snapshot of *ATP-binding cassette sub-family E member 1 (Abce1)*.** Cumulative Ht- and  
838 CHX-stabilized RFP counts from Tm-treated and untreated (Unt) cells are mapped to the genome and visualized  
839 in the UCSC web browser. Numbers on the right hand side indicate maximum read counts in the respective  
840 lane. Gray lines indicate introns. The arrow indicates a peak of Ht-stabilised RFP that corresponds to a non-start  
841 codon. This peak is not present in CHX-stabilised RFP, indicating that this is most likely a Ht-induced artefact.

842

843 **S4 Fig. Web browser snapshot of *Tfcp2*.** Aggregate Ht- and CHX-stabilized RFP reads from Tm-treated and  
844 untreated (Unt) cells are mapped to the genome and visualized in the UCSC web browser. Numbers on the  
845 right hand side indicate maximum read counts in the respective lane. Arrows indicate Ht peaks. Gray lines  
846 indicate introns. Part of the 3'UTR is cropped.

847

848 **S5 Fig. Web browser snapshot of *Ranbp1*.** Cumulative Ht- and CHX-stabilized RFP counts from Tm-treated and  
849 untreated (Unt) cells are mapped to the genome and visualized in the UCSC web browser. Numbers on the  
850 right hand side indicate maximum read counts in the respective lane. Gray lines indicate introns. The uORFs in  
851 the 5'UTR and the protein coding ORF (CDS) are indicated.

852

853 **S6 Fig. Web browser snapshot of the 5'UTR of *Proline Rich Receptor Coactivator 2 (Pnrc2)*.** Aggregate Ht- and  
854 CHX-stabilized RFP counts from three replicates of Tm-treated and untreated (Unt) cells are mapped to the  
855 genome and visualized in the UCSC web browser. Numbers on the right hand side indicate maximum read

856 counts in the respective lane. Introns have been skipped. The data indicate two uORF that are depicted by grey  
857 boxes. Only the start of the protein coding ORF is shown. Two arrows in the top lane (Unt, Ht RFP) indicate TIS  
858 at start codons (CUG for uORF1; AUG for uORF2). uORF1 is 48 codons in length, uORF2 is 42 codons in length,  
859 they are separated by 17 nt, and the distance between uORF2 and the AUG start codon is 14 nt.

860

861 **S7 Fig. Comparison of ribosome occupancy in response to eIF2 phosphorylation in HEK293 cells (Andreev et**  
862 **al.) and mouse erythroblasts (Paolini et al.).** Triangles indicate transcripts of which translation is similarly  
863 upregulated upon eIF2 phosphorylation in both studies. White circles represent transcripts with enhanced  
864 translation (Z-score >3) in HEK293 cells but not in mouse erythroblasts; dark grey circles represent transcripts  
865 with enhanced translation in mouse erythroblasts (FDR<0.01) but not in HEK293.

866

867 **S1 Table. Overview of ribosome footprint reads mapped with STAR.** Ribosome reads were mapped with STAR  
868 to the genome. This table gives an overview of read length and how many reads mapped to the genome for  
869 each sample. Note: Multi-mapped reads were not discarded, unless they mapped to more than 20 locations.

870

871 **S2 Table. Normalised sequence counts for ribosome footprints (RFP) and pA+ RNA sequencing (counts per**  
872 **million; cpm).** 2Log normalized RFP reads (cpm) of the CDS of all transcripts in Tm-treated cells were compared  
873 to untreated cells. List of significantly altered transcripts during Tm treatment in erythroblasts, cpm values are  
874 given for each sample for ribosome profiling and RNAseq.

875

876 **S3 Table. List of upregulated transcripts during Tm treatment.** Upregulated targets were uploaded on  
877 Genetrail2 to investigate enrichment of cellular component, biological processes and molecular function.

878

879 **S4 Table. List of downregulated transcripts during Tm treatment.** Downregulated targets were uploaded on  
880 Genetrail2 to investigate enrichment of cellular component, biological processes and molecular function.

881

882 **S5 Table. Translation initiation sites detected by stalling of ribosomes in the presence of Harringtonine.** Peaks  
883 were called with the cumulative reads of each triplicate, with our previously developed peak calling algorithm  
884 to identify translation initiation sites (TIS). Peaks were divided into 5'UTR TISs, annotated start codon TISs, TISs

885 in the CDS, or in the 3'UTR. The analysis was performed both with a setting of peaks at -12nt and at -13nt from  
886 the read start. Peaks were assigned to AUG, CUG, GUG or UUG start codons at either +12 or +13 from the start  
887 of the protected fragment. All other peaks were assigned to the codon at the +13 position counted from the  
888 top of the peak. TISs in the 5'UTR, the CDS, annotated starts were fused to gene name in random order.  
889 Positions are +13 positions, unless a atg, ctg, gtg or ttg occurs at +12, or +14. in that case the atg, ctg, gtg or  
890 ttg was preferred.

891

892 **S6 Table. Codons at -13 (P) position of translation initiation sites, measured after ribosome stalling with**  
893 **Harringtonine.** Called peaks and triplet codons were compared in untreated and Tm-treated erythroblasts.

894

895 **S7 Table. Transcripts with differential use of TIS in absence and presence of tunicamycin.** Peak intensity ratio  
896 between TIS peaks in stressed cells were compared to untreated cells for specific transcripts. At a p-value less  
897 than 0.01 few transcripts revealed differentially employed TISs in their 5'UTR Coverage: cumulative reads of the  
898 peak. Statistics: two way ANOVA between triplicate samples of both conditions

899

900

901

902

903

904

905

906

907

908

909

910

911

912

913

914

915

916

917

918

919

## Figure 1

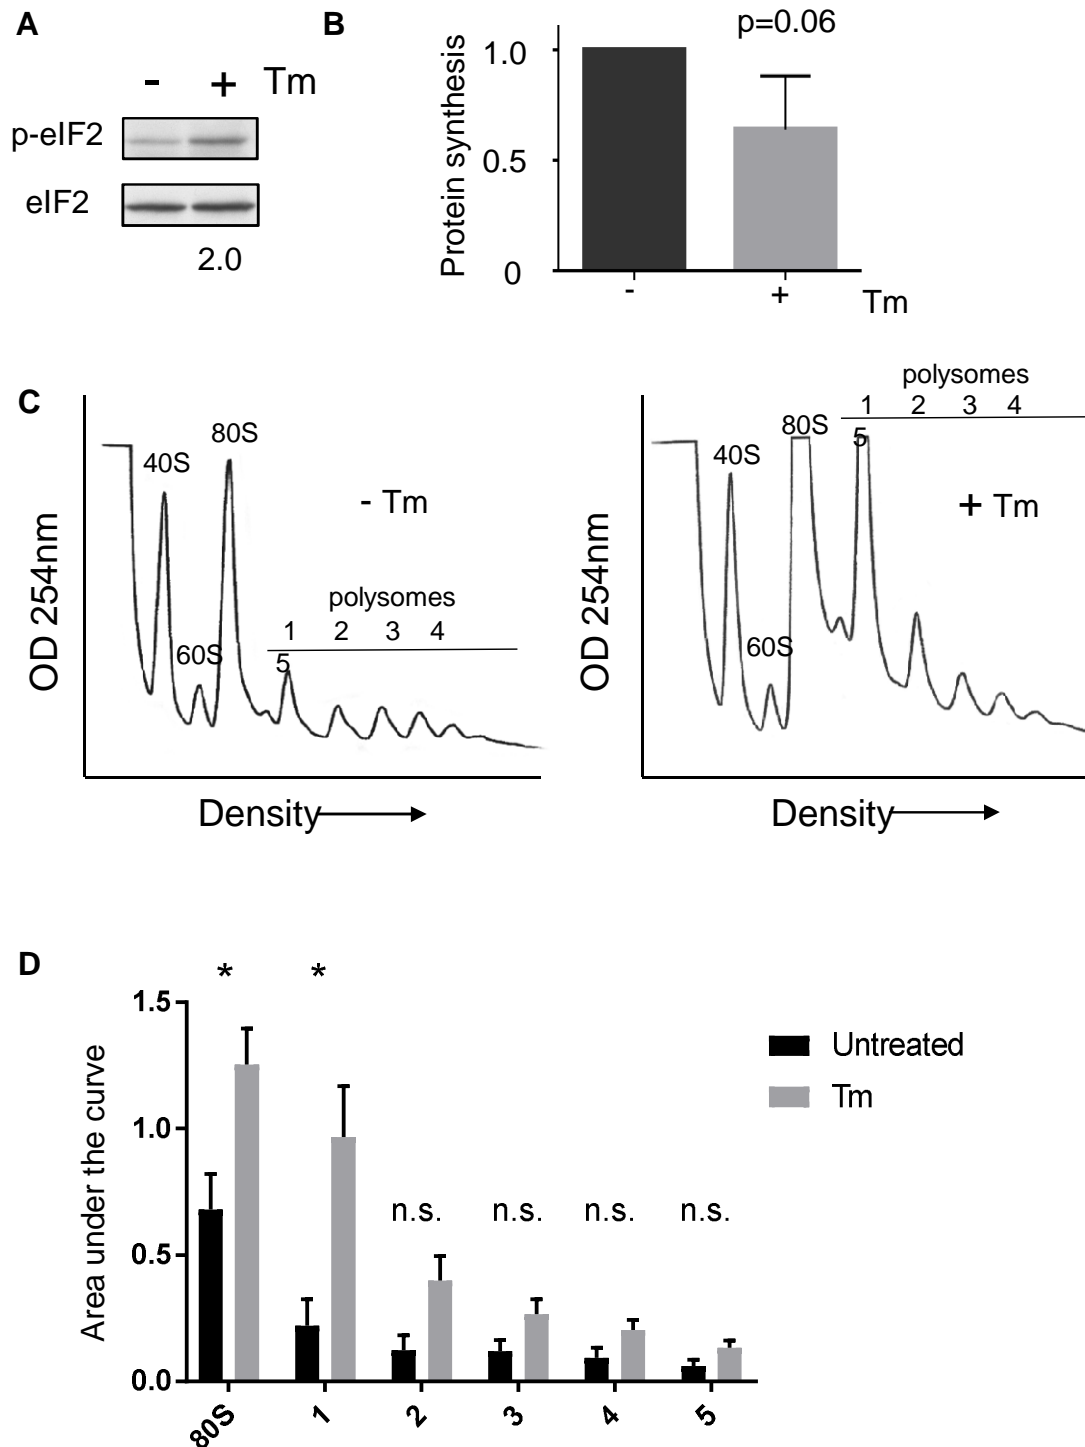

## Figure 2

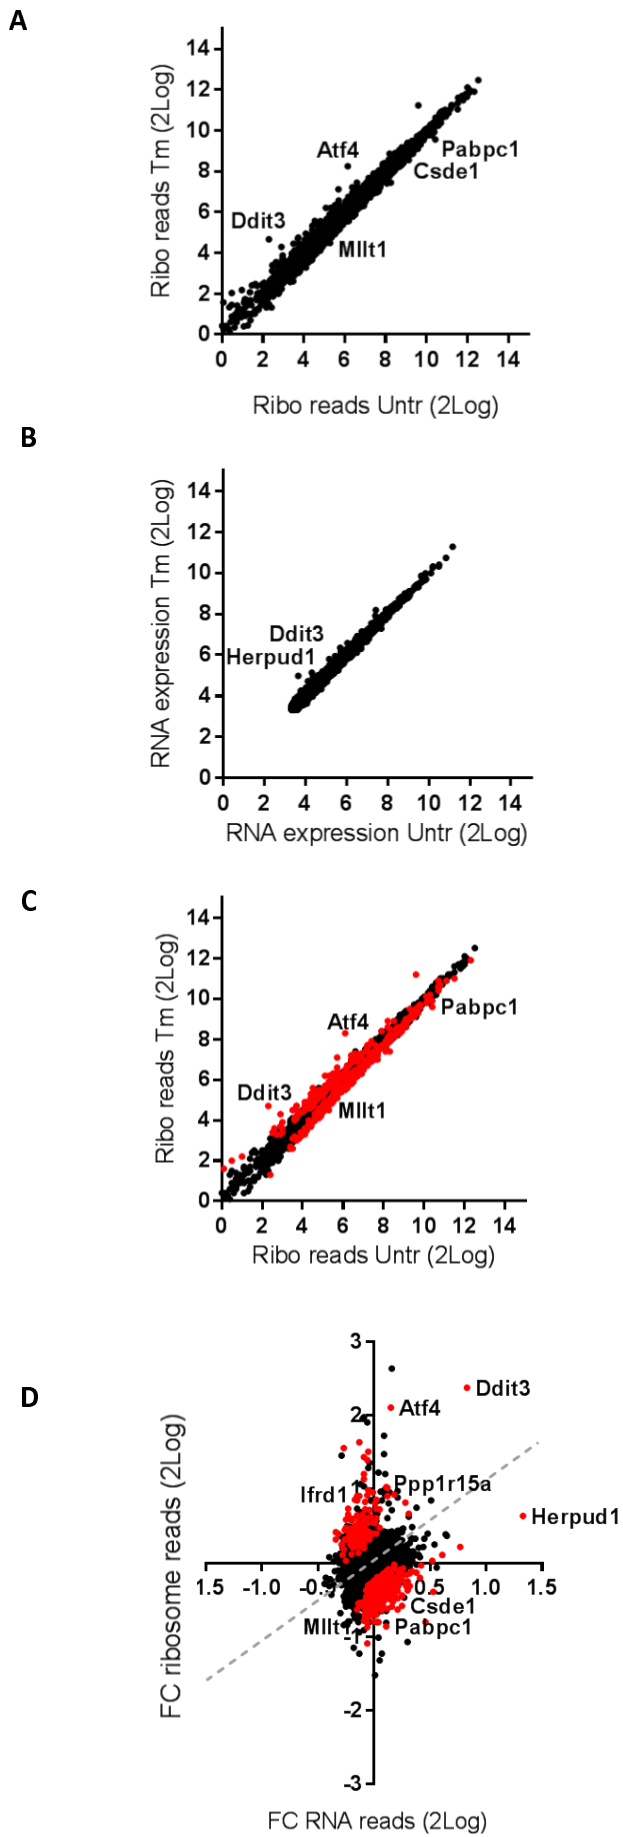



## Figure 3

A

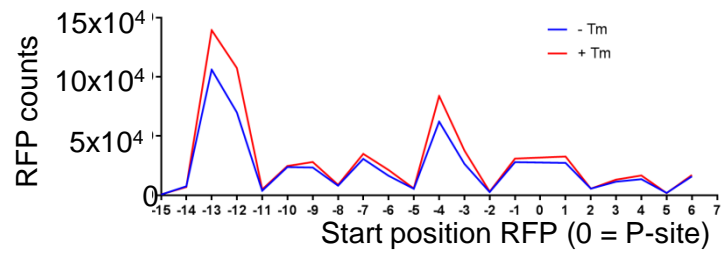

B

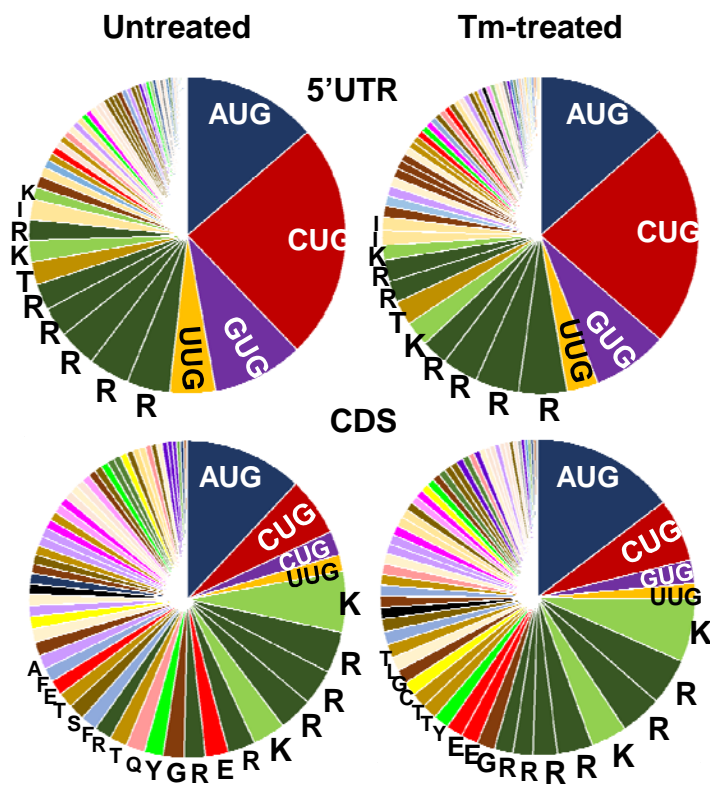

C

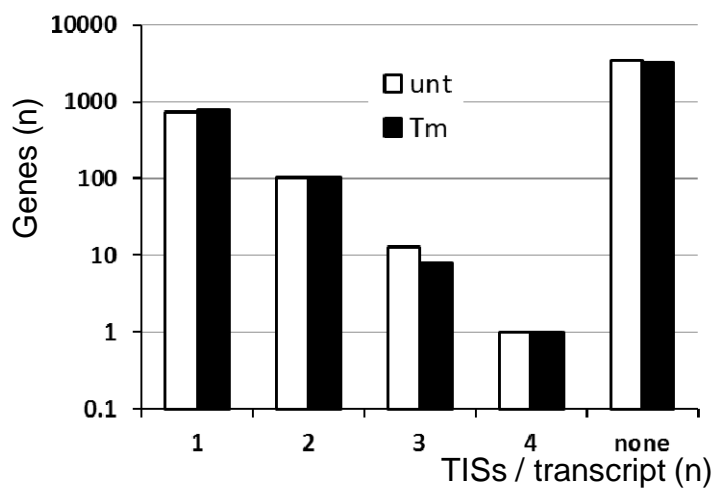

## Figure 4

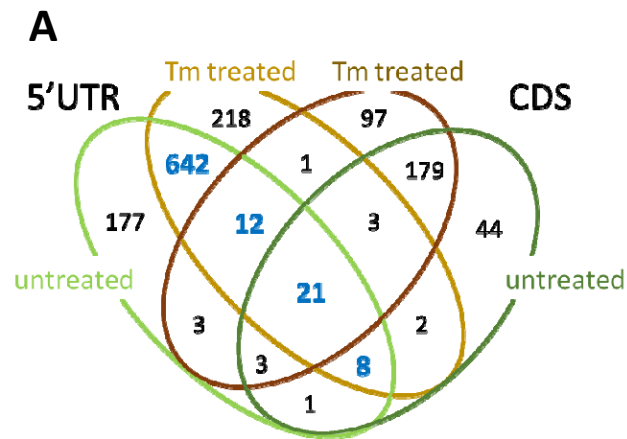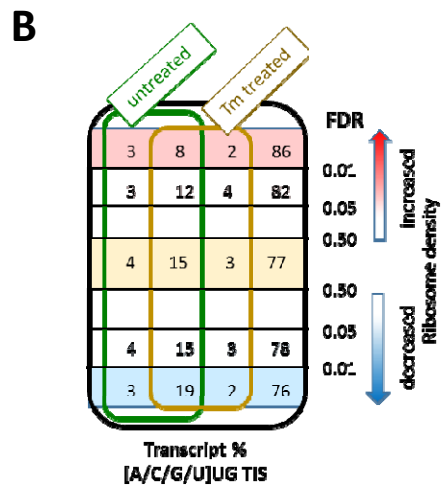

## Figure 5

A

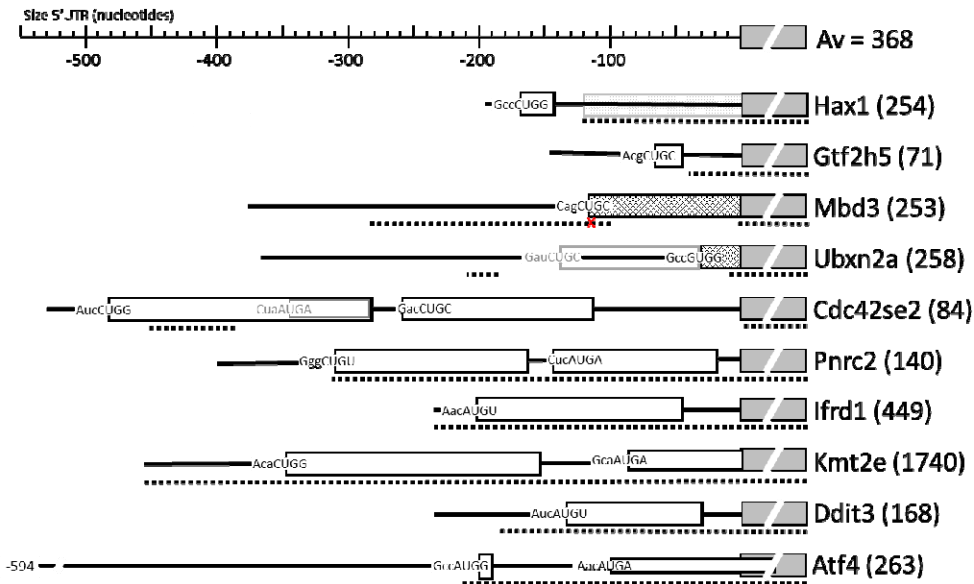

B

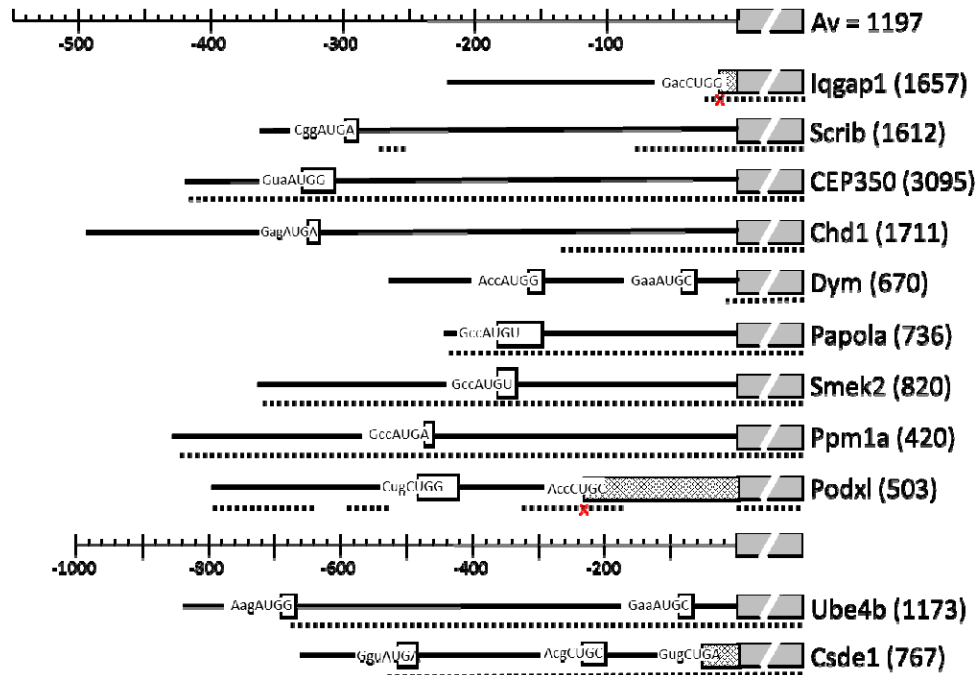

Source: http://biorxiv.org/content/10.1101/216234v1.full.pdf
